# Supplementary material
Source: PubMed Central journal article supplement (PMC8902340)

## SUPPLEMENTARY MATERIAL

**Supplementary Table 1.** Characteristics of clinical trials included in the analysis (n=538).

| Variable                                                       | Open-label<br>(n=366)<br>No. (%) | Blinded<br>(n=148)<br>No. (%) | Unclear<br>(n=24)<br>No. (%) |
|----------------------------------------------------------------|----------------------------------|-------------------------------|------------------------------|
| PRO differences favoring the experimental arm                  | 150 (41.0)                       | 72 (48.7)                     | 5 (20.8)                     |
| International                                                  | 143 (39.1)                       | 74 (50.0)                     | 7 (29.2)                     |
| Industry funding, fully or in part                             | 188 (51.4)                       | 100 (67.6)                    | 7 (29.2)                     |
| Sample size n>200                                              | 247 (67.5)                       | 83 (56.1)                     | 17 (70.8)                    |
| Year of publication $\geq$ 2014 <sup>a</sup>                   | 100 (27.3)                       | 52 (35.1)                     | 4 (16.7)                     |
| PRO primary endpoint                                           | 73 (20.0)                        | 51 (34.5)                     | 7 (29.2)                     |
| Disease stage                                                  |                                  |                               |                              |
| Metastatic/Advanced                                            | 173 (47.3)                       | 55 (37.2)                     | 10 (41.7)                    |
| Non metastatic/Local                                           | 115 (31.4)                       | 47 (31.8)                     | 9 (37.5)                     |
| Both                                                           | 61 (16.7)                        | 31 (20.9)                     | 2 (8.3)                      |
| Unclear                                                        | 17 (4.6)                         | 15 (10.1)                     | 3 (12.5)                     |
| CONSORT-PRO summary score <sup>b</sup> ,<br>mean (SD), [range] | 3.01 (1.44) [0-6]                | 2.96 (1.47) [0-6]             | 3.13 (1.39) [1-6]            |

<sup>a</sup> This cut-off date was based on the publication of the CONSORT-PRO extension (7). PRO= Patient Reported Outcomes; CONSORT= CONSolidated Standards Of Reporting Trials; SD, standard deviation.

<sup>b</sup> The CONSORT PRO-summary score ranges from 0 to 6. The original CONSORT-PRO extension consists of 5 items, however, for the purpose of our study the item P6a was split in two, to maximize information on quality of PRO reporting.

**Supplementary Table 2.** Multivariable logistic regression model for the occurrence of PRO differences favoring the experimental treatment arm (sensitivity analysis considering trials with missing information on treatment concealment as “open-label”, n=538)<sup>a</sup>

| Variable                                       | OR (95% CI)      | <i>P</i> <sup>b</sup> |
|------------------------------------------------|------------------|-----------------------|
| Blinded (yes vs no)                            | 1.24 (0.83-1.86) | 0.30                  |
| International (yes vs no)                      | 0.92 (0.60-1.40) | 0.68                  |
| Industry funding, fully or in part (yes vs no) | 1.39 (0.93-2.08) | 0.11                  |
| Sample size n>200 (yes vs no)                  | 0.63 (0.41-0.97) | 0.04                  |
| Year of publication $\geq$ 2014 <sup>c</sup>   | 0.95 (0.64-1.42) | 0.80                  |
| PRO primary endpoint (yes vs no)               | 1.65 (1.06-2.58) | 0.03                  |
| Disease stage                                  |                  |                       |
| Metastatic/Advanced vs Non metastatic/Local    | 0.94 (0.61-1.44) | 0.77                  |
| Both/unclear vs Non metastatic/Local           | 0.93 (0.58-1.51) | 0.77                  |
| CONSORT-PRO summary score <sup>d</sup>         | 1.13 (1.00-1.29) | 0.06                  |

<sup>a</sup>This table represents the association of key randomized controlled trial characteristics with the chance of finding statistically significant differences favoring the experimental arm. CI = confidence interval; OR = odds ratio; PRO= Patient Reported Outcomes; CONSORT= CONSolidated Standards Of Reporting Trials.

<sup>b</sup> 2-sided Wald chi-square test.

<sup>c</sup>This cut-off date was based on the publication of the CONSORT-PRO extension (7)

<sup>d</sup> The CONSORT PRO-summary score ranging from 0 to 6 was included in the model as a continuous variable. The original CONSORT-PRO extension consists of 5 items, however, for the purpose of our study the item P6a was split in two, to maximize information on quality of PRO reporting.

**Supplementary Figure 1.** Selection process of studies and summary of analyses performed

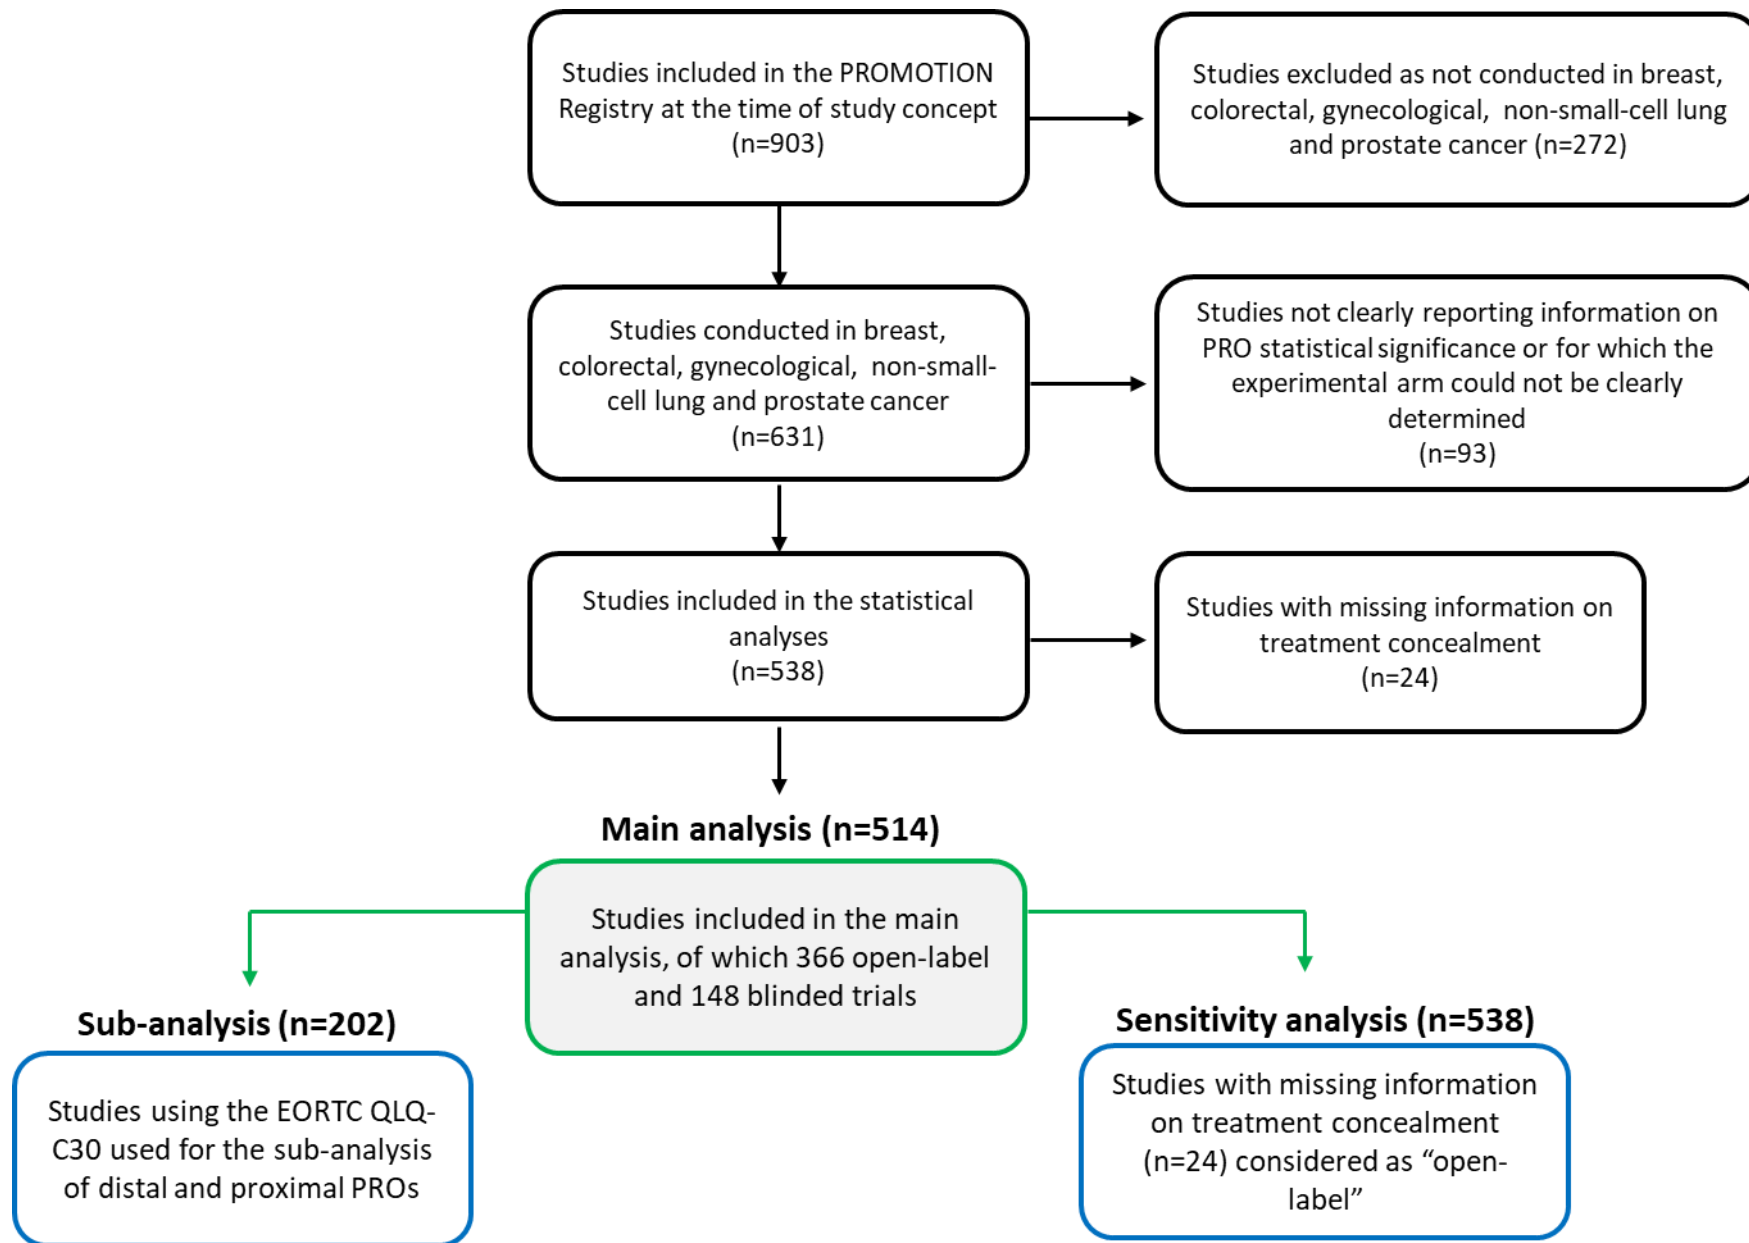

Supplement: djab177_supplementary_data.pdf [file djab177_supplementary_data.pdf]
